# Supplementary material
Source: ML conference proceedings conference paper supplement (https://proceedings.neurips.cc/paper_files/paper/2022/hash/3f1f3e38d1ce5653afb81505d3e26618-Abstract.html)
Supplement: Supplementary file 1 [file 3f1f3e38d1ce5653afb81505d3e26618-Supplemental-Conference.zip]

Archive with 157 entries (129 files):
- Neurips_NNDM_Barrier/
- __MACOSX/._Neurips_NNDM_Barrier
- Neurips_NNDM_Barrier/LICENSE.md
- __MACOSX/Neurips_NNDM_Barrier/._LICENSE.md
- Neurips_NNDM_Barrier/.DS_Store
- __MACOSX/Neurips_NNDM_Barrier/._.DS_Store
- Neurips_NNDM_Barrier/Dockerfile
- __MACOSX/Neurips_NNDM_Barrier/._Dockerfile
- Neurips_NNDM_Barrier/Appendices/
- Neurips_NNDM_Barrier/README.md
- __MACOSX/Neurips_NNDM_Barrier/._README.md
- Neurips_NNDM_Barrier/NeuralNetControlBarrier.jl/
- __MACOSX/Neurips_NNDM_Barrier/._NeuralNetControlBarrier.jl
- Neurips_NNDM_Barrier/Project.toml
- __MACOSX/Neurips_NNDM_Barrier/._Project.toml
- Neurips_NNDM_Barrier/licenseFile/
- __MACOSX/Neurips_NNDM_Barrier/._licenseFile
- Neurips_NNDM_Barrier/Appendices/Appendix.pdf
- __MACOSX/Neurips_NNDM_Barrier/Appendices/._Appendix.pdf
- Neurips_NNDM_Barrier/NeuralNetControlBarrier.jl/run.bash
- __MACOSX/Neurips_NNDM_Barrier/NeuralNetControlBarrier.jl/._run.bash
- Neurips_NNDM_Barrier/NeuralNetControlBarrier.jl/probabilities/
- __MACOSX/Neurips_NNDM_Barrier/NeuralNetControlBarrier.jl/._probabilities
- Neurips_NNDM_Barrier/NeuralNetControlBarrier.jl/Optimization/
- __MACOSX/Neurips_NNDM_Barrier/NeuralNetControlBarrier.jl/._Optimization
- Neurips_NNDM_Barrier/NeuralNetControlBarrier.jl/models/
- __MACOSX/Neurips_NNDM_Barrier/NeuralNetControlBarrier.jl/._models
- Neurips_NNDM_Barrier/NeuralNetControlBarrier.jl/Project.toml
- __MACOSX/Neurips_NNDM_Barrier/NeuralNetControlBarrier.jl/._Project.toml
- Neurips_NNDM_Barrier/NeuralNetControlBarrier.jl/src/
- __MACOSX/Neurips_NNDM_Barrier/NeuralNetControlBarrier.jl/._src
- Neurips_NNDM_Barrier/licenseFile/PLACE_MOSEK_FILE_HERE
- __MACOSX/Neurips_NNDM_Barrier/licenseFile/._PLACE_MOSEK_FILE_HERE
- Neurips_NNDM_Barrier/NeuralNetControlBarrier.jl/probabilities/VALS_WILL_PRINT_HERE.txt
- __MACOSX/Neurips_NNDM_Barrier/NeuralNetControlBarrier.jl/probabilities/._VALS_WILL_PRINT_HERE.txt
- Neurips_NNDM_Barrier/NeuralNetControlBarrier.jl/Optimization/verification_husky4d.jl
- __MACOSX/Neurips_NNDM_Barrier/NeuralNetControlBarrier.jl/Optimization/._verification_husky4d.jl
- Neurips_NNDM_Barrier/NeuralNetControlBarrier.jl/Optimization/verification_husky5d.jl
- __MACOSX/Neurips_NNDM_Barrier/NeuralNetControlBarrier.jl/Optimization/._verification_husky5d.jl
- Neurips_NNDM_Barrier/NeuralNetControlBarrier.jl/Optimization/verification_pendulum.jl
- __MACOSX/Neurips_NNDM_Barrier/NeuralNetControlBarrier.jl/Optimization/._verification_pendulum.jl
- Neurips_NNDM_Barrier/NeuralNetControlBarrier.jl/Optimization/verification_cartpole.jl
- __MACOSX/Neurips_NNDM_Barrier/NeuralNetControlBarrier.jl/Optimization/._verification_cartpole.jl
- Neurips_NNDM_Barrier/NeuralNetControlBarrier.jl/Optimization/verification_acrobot.jl
- __MACOSX/Neurips_NNDM_Barrier/NeuralNetControlBarrier.jl/Optimization/._verification_acrobot.jl
- Neurips_NNDM_Barrier/NeuralNetControlBarrier.jl/models/husky4d/
- __MACOSX/Neurips_NNDM_Barrier/NeuralNetControlBarrier.jl/models/._husky4d
- Neurips_NNDM_Barrier/NeuralNetControlBarrier.jl/models/pendulum/
- __MACOSX/Neurips_NNDM_Barrier/NeuralNetControlBarrier.jl/models/._pendulum
- Neurips_NNDM_Barrier/NeuralNetControlBarrier.jl/models/cartpole/
- __MACOSX/Neurips_NNDM_Barrier/NeuralNetControlBarrier.jl/models/._cartpole
- Neurips_NNDM_Barrier/NeuralNetControlBarrier.jl/models/husky5d/
- __MACOSX/Neurips_NNDM_Barrier/NeuralNetControlBarrier.jl/models/._husky5d
- Neurips_NNDM_Barrier/NeuralNetControlBarrier.jl/models/acrobot/
- __MACOSX/Neurips_NNDM_Barrier/NeuralNetControlBarrier.jl/models/._acrobot
- Neurips_NNDM_Barrier/NeuralNetControlBarrier.jl/src/Optimizer.jl
- __MACOSX/Neurips_NNDM_Barrier/NeuralNetControlBarrier.jl/src/._Optimizer.jl
- Neurips_NNDM_Barrier/NeuralNetControlBarrier.jl/src/NeuralNetControlBarrier.jl
- __MACOSX/Neurips_NNDM_Barrier/NeuralNetControlBarrier.jl/src/._NeuralNetControlBarrier.jl
- Neurips_NNDM_Barrier/NeuralNetControlBarrier.jl/src/Controllers.jl
- __MACOSX/Neurips_NNDM_Barrier/NeuralNetControlBarrier.jl/src/._Controllers.jl
- Neurips_NNDM_Barrier/NeuralNetControlBarrier.jl/src/Functions.jl
- __MACOSX/Neurips_NNDM_Barrier/NeuralNetControlBarrier.jl/src/._Functions.jl
- Neurips_NNDM_Barrier/NeuralNetControlBarrier.jl/src/Systems.jl
- __MACOSX/Neurips_NNDM_Barrier/NeuralNetControlBarrier.jl/src/._Systems.jl
- Neurips_NNDM_Barrier/NeuralNetControlBarrier.jl/models/husky4d/alpha/
- __MACOSX/Neurips_NNDM_Barrier/NeuralNetControlBarrier.jl/models/husky4d/._alpha
- Neurips_NNDM_Barrier/NeuralNetControlBarrier.jl/models/pendulum/alpha/
- __MACOSX/Neurips_NNDM_Barrier/NeuralNetControlBarrier.jl/models/pendulum/._alpha
- Neurips_NNDM_Barrier/NeuralNetControlBarrier.jl/models/cartpole/alpha/
- __MACOSX/Neurips_NNDM_Barrier/NeuralNetControlBarrier.jl/models/cartpole/._alpha
- Neurips_NNDM_Barrier/NeuralNetControlBarrier.jl/models/husky5d/alpha/
- __MACOSX/Neurips_NNDM_Barrier/NeuralNetControlBarrier.jl/models/husky5d/._alpha
- Neurips_NNDM_Barrier/NeuralNetControlBarrier.jl/models/acrobot/alpha/
- __MACOSX/Neurips_NNDM_Barrier/NeuralNetControlBarrier.jl/models/acrobot/._alpha
- Neurips_NNDM_Barrier/NeuralNetControlBarrier.jl/models/husky4d/alpha/1_layers/
- __MACOSX/Neurips_NNDM_Barrier/NeuralNetControlBarrier.jl/models/husky4d/alpha/._1_layers
- Neurips_NNDM_Barrier/NeuralNetControlBarrier.jl/models/husky4d/alpha/2_layers/
- __MACOSX/Neurips_NNDM_Barrier/NeuralNetControlBarrier.jl/models/husky4d/alpha/._2_layers
- Neurips_NNDM_Barrier/NeuralNetControlBarrier.jl/models/pendulum/alpha/1_layers/
- __MACOSX/Neurips_NNDM_Barrier/NeuralNetControlBarrier.jl/models/pendulum/alpha/._1_layers
- Neurips_NNDM_Barrier/NeuralNetControlBarrier.jl/models/pendulum/alpha/3_layers/
- __MACOSX/Neurips_NNDM_Barrier/NeuralNetControlBarrier.jl/models/pendulum/alpha/._3_layers
- Neurips_NNDM_Barrier/NeuralNetControlBarrier.jl/models/pendulum/alpha/5_layers/
- __MACOSX/Neurips_NNDM_Barrier/NeuralNetControlBarrier.jl/models/pendulum/alpha/._5_layers
- Neurips_NNDM_Barrier/NeuralNetControlBarrier.jl/models/pendulum/alpha/2_layers/
- __MACOSX/Neurips_NNDM_Barrier/NeuralNetControlBarrier.jl/models/pendulum/alpha/._2_layers
- Neurips_NNDM_Barrier/NeuralNetControlBarrier.jl/models/cartpole/alpha/1_layers/
- __MACOSX/Neurips_NNDM_Barrier/NeuralNetControlBarrier.jl/models/cartpole/alpha/._1_layers
- Neurips_NNDM_Barrier/NeuralNetControlBarrier.jl/models/cartpole/alpha/2_layers/
- __MACOSX/Neurips_NNDM_Barrier/NeuralNetControlBarrier.jl/models/cartpole/alpha/._2_layers
- Neurips_NNDM_Barrier/NeuralNetControlBarrier.jl/models/husky5d/alpha/1_layers/
- __MACOSX/Neurips_NNDM_Barrier/NeuralNetControlBarrier.jl/models/husky5d/alpha/._1_layers
- Neurips_NNDM_Barrier/NeuralNetControlBarrier.jl/models/acrobot/alpha/1_layers/
- __MACOSX/Neurips_NNDM_Barrier/NeuralNetControlBarrier.jl/models/acrobot/alpha/._1_layers
- Neurips_NNDM_Barrier/NeuralNetControlBarrier.jl/models/husky4d/alpha/1_layers/partition_data_3600.mat
- __MACOSX/Neurips_NNDM_Barrier/NeuralNetControlBarrier.jl/models/husky4d/alpha/1_layers/._partition_data_3600.mat
- Neurips_NNDM_Barrier/NeuralNetControlBarrier.jl/models/husky4d/alpha/1_layers/partition_data_2250.mat
- __MACOSX/Neurips_NNDM_Barrier/NeuralNetControlBarrier.jl/models/husky4d/alpha/1_layers/._partition_data_2250.mat
- Neurips_NNDM_Barrier/NeuralNetControlBarrier.jl/models/husky4d/alpha/1_layers/partition_data_900.mat
- __MACOSX/Neurips_NNDM_Barrier/NeuralNetControlBarrier.jl/models/husky4d/alpha/1_layers/._partition_data_900.mat
- Neurips_NNDM_Barrier/NeuralNetControlBarrier.jl/models/husky4d/alpha/1_layers/partition_data_1800.mat
- __MACOSX/Neurips_NNDM_Barrier/NeuralNetControlBarrier.jl/models/husky4d/alpha/1_layers/._partition_data_1800.mat
- Neurips_NNDM_Barrier/NeuralNetControlBarrier.jl/models/husky4d/alpha/2_layers/partition_data_2250.mat
- __MACOSX/Neurips_NNDM_Barrier/NeuralNetControlBarrier.jl/models/husky4d/alpha/2_layers/._partition_data_2250.mat
- Neurips_NNDM_Barrier/NeuralNetControlBarrier.jl/models/husky4d/alpha/2_layers/partition_data_4800.mat
- __MACOSX/Neurips_NNDM_Barrier/NeuralNetControlBarrier.jl/models/husky4d/alpha/2_layers/._partition_data_4800.mat
- Neurips_NNDM_Barrier/NeuralNetControlBarrier.jl/models/husky4d/alpha/2_layers/partition_data_900.mat
- __MACOSX/Neurips_NNDM_Barrier/NeuralNetControlBarrier.jl/models/husky4d/alpha/2_layers/._partition_data_900.mat
- Neurips_NNDM_Barrier/NeuralNetControlBarrier.jl/models/husky4d/alpha/2_layers/partition_data_1800.mat
- __MACOSX/Neurips_NNDM_Barrier/NeuralNetControlBarrier.jl/models/husky4d/alpha/2_layers/._partition_data_1800.mat
- Neurips_NNDM_Barrier/NeuralNetControlBarrier.jl/models/pendulum/alpha/1_layers/partition_data_480.mat
- __MACOSX/Neurips_NNDM_Barrier/NeuralNetControlBarrier.jl/models/pendulum/alpha/1_layers/._partition_data_480.mat
- Neurips_NNDM_Barrier/NeuralNetControlBarrier.jl/models/pendulum/alpha/1_layers/partition_data_240.mat
- __MACOSX/Neurips_NNDM_Barrier/NeuralNetControlBarrier.jl/models/pendulum/alpha/1_layers/._partition_data_240.mat
- Neurips_NNDM_Barrier/NeuralNetControlBarrier.jl/models/pendulum/alpha/1_layers/partition_data_120.mat
- __MACOSX/Neurips_NNDM_Barrier/NeuralNetControlBarrier.jl/models/pendulum/alpha/1_layers/._partition_data_120.mat
- Neurips_NNDM_Barrier/NeuralNetControlBarrier.jl/models/pendulum/alpha/3_layers/partition_data_480.mat
- __MACOSX/Neurips_NNDM_Barrier/NeuralNetControlBarrier.jl/models/pendulum/alpha/3_layers/._partition_data_480.mat
- Neurips_NNDM_Barrier/NeuralNetControlBarrier.jl/models/pendulum/alpha/3_layers/partition_data_240.mat
- __MACOSX/Neurips_NNDM_Barrier/NeuralNetControlBarrier.jl/models/pendulum/alpha/3_layers/._partition_data_240.mat
- Neurips_NNDM_Barrier/NeuralNetControlBarrier.jl/models/pendulum/alpha/3_layers/partition_data_120.mat
- __MACOSX/Neurips_NNDM_Barrier/NeuralNetControlBarrier.jl/models/pendulum/alpha/3_layers/._partition_data_120.mat
- Neurips_NNDM_Barrier/NeuralNetControlBarrier.jl/models/pendulum/alpha/5_layers/partition_data_1920.mat
- __MACOSX/Neurips_NNDM_Barrier/NeuralNetControlBarrier.jl/models/pendulum/alpha/5_layers/._partition_data_1920.mat
- Neurips_NNDM_Barrier/NeuralNetControlBarrier.jl/models/pendulum/alpha/5_layers/partition_data_480.mat
- __MACOSX/Neurips_NNDM_Barrier/NeuralNetControlBarrier.jl/models/pendulum/alpha/5_layers/._partition_data_480.mat
- Neurips_NNDM_Barrier/NeuralNetControlBarrier.jl/models/pendulum/alpha/5_layers/partition_data_960.mat
- __MACOSX/Neurips_NNDM_Barrier/NeuralNetControlBarrier.jl/models/pendulum/alpha/5_layers/._partition_data_960.mat
- Neurips_NNDM_Barrier/NeuralNetControlBarrier.jl/models/pendulum/alpha/2_layers/partition_data_480.mat
- __MACOSX/Neurips_NNDM_Barrier/NeuralNetControlBarrier.jl/models/pendulum/alpha/2_layers/._partition_data_480.mat
- Neurips_NNDM_Barrier/NeuralNetControlBarrier.jl/models/pendulum/alpha/2_layers/partition_data_240.mat
- __MACOSX/Neurips_NNDM_Barrier/NeuralNetControlBarrier.jl/models/pendulum/alpha/2_layers/._partition_data_240.mat
- Neurips_NNDM_Barrier/NeuralNetControlBarrier.jl/models/pendulum/alpha/2_layers/partition_data_120.mat
- __MACOSX/Neurips_NNDM_Barrier/NeuralNetControlBarrier.jl/models/pendulum/alpha/2_layers/._partition_data_120.mat
- Neurips_NNDM_Barrier/NeuralNetControlBarrier.jl/models/cartpole/alpha/1_layers/partition_data_1920.mat
- __MACOSX/Neurips_NNDM_Barrier/NeuralNetControlBarrier.jl/models/cartpole/alpha/1_layers/._partition_data_1920.mat
- Neurips_NNDM_Barrier/NeuralNetControlBarrier.jl/models/cartpole/alpha/1_layers/partition_data_3840.mat
- __MACOSX/Neurips_NNDM_Barrier/NeuralNetControlBarrier.jl/models/cartpole/alpha/1_layers/._partition_data_3840.mat
- Neurips_NNDM_Barrier/NeuralNetControlBarrier.jl/models/cartpole/alpha/1_layers/partition_data_960.mat
- __MACOSX/Neurips_NNDM_Barrier/NeuralNetControlBarrier.jl/models/cartpole/alpha/1_layers/._partition_data_960.mat
- Neurips_NNDM_Barrier/NeuralNetControlBarrier.jl/models/cartpole/alpha/2_layers/partition_data_1920.mat
- __MACOSX/Neurips_NNDM_Barrier/NeuralNetControlBarrier.jl/models/cartpole/alpha/2_layers/._partition_data_1920.mat
- Neurips_NNDM_Barrier/NeuralNetControlBarrier.jl/models/cartpole/alpha/2_layers/partition_data_3840.mat
- __MACOSX/Neurips_NNDM_Barrier/NeuralNetControlBarrier.jl/models/cartpole/alpha/2_layers/._partition_data_3840.mat
- Neurips_NNDM_Barrier/NeuralNetControlBarrier.jl/models/cartpole/alpha/2_layers/partition_data_960.mat
- __MACOSX/Neurips_NNDM_Barrier/NeuralNetControlBarrier.jl/models/cartpole/alpha/2_layers/._partition_data_960.mat
- Neurips_NNDM_Barrier/NeuralNetControlBarrier.jl/models/husky5d/alpha/1_layers/partition_data_1728.mat
- __MACOSX/Neurips_NNDM_Barrier/NeuralNetControlBarrier.jl/models/husky5d/alpha/1_layers/._partition_data_1728.mat
- Neurips_NNDM_Barrier/NeuralNetControlBarrier.jl/models/husky5d/alpha/1_layers/partition_data_1080.mat
- __MACOSX/Neurips_NNDM_Barrier/NeuralNetControlBarrier.jl/models/husky5d/alpha/1_layers/._partition_data_1080.mat
- Neurips_NNDM_Barrier/NeuralNetControlBarrier.jl/models/husky5d/alpha/1_layers/partition_data_432.mat
- __MACOSX/Neurips_NNDM_Barrier/NeuralNetControlBarrier.jl/models/husky5d/alpha/1_layers/._partition_data_432.mat
- Neurips_NNDM_Barrier/NeuralNetControlBarrier.jl/models/acrobot/alpha/1_layers/partition_data_288.mat
- __MACOSX/Neurips_NNDM_Barrier/NeuralNetControlBarrier.jl/models/acrobot/alpha/1_layers/._partition_data_288.mat
- Neurips_NNDM_Barrier/NeuralNetControlBarrier.jl/models/acrobot/alpha/1_layers/partition_data_144.mat
- __MACOSX/Neurips_NNDM_Barrier/NeuralNetControlBarrier.jl/models/acrobot/alpha/1_layers/._partition_data_144.mat
