# Supplementary material
Source: ML conference proceedings conference paper supplement (https://proceedings.neurips.cc/paper_files/paper/2022/hash/3f1f3e38d1ce5653afb81505d3e26618-Abstract.html)
Supplement: Supplementary file 1 [file 3f1f3e38d1ce5653afb81505d3e26618-Supplemental-Conference.zip › Neurips_NNDM_Barrier/NeuralNetControlBarrier.jl/Project.toml]

name = "NeuralNetControlBarrier"
uuid = "1d3a7e91-7213-4a76-aa02-babd5242f7bf"
version = "0.1.0"

[deps]
Combinatorics = "861a8166-3701-5b0c-9a16-15d98fcdc6aa"
DynamicPolynomials = "7c1d4256-1411-5781-91ec-d7bc3513ac07"
GLPK = "60bf3e95-4087-53dc-ae20-288a0d20c6a6"
JuMP = "4076af6c-e467-56ae-b986-b466b2749572"
LinearAlgebra = "37e2e46d-f89d-539d-b4ee-838fcccc9c8e"
MAT = "23992714-dd62-5051-b70f-ba57cb901cac"
MosekTools = "1ec41992-ff65-5c91-ac43-2df89e9693a4"
MultivariatePolynomials = "102ac46a-7ee4-5c85-9060-abc95bfdeaa3"
Optim = "429524aa-4258-5aef-a3af-852621145aeb"
Polynomials = "f27b6e38-b328-58d1-80ce-0feddd5e7a45"
Revise = "295af30f-e4ad-537b-8983-00126c2a3abe"
StatsBase = "2913bbd2-ae8a-5f71-8c99-4fb6c76f3a91"
SumOfSquares = "4b9e565b-77fc-50a5-a571-1244f986bda1"
