# Supplementary material
Source: ML conference proceedings conference paper supplement (https://proceedings.neurips.cc/paper_files/paper/2022/hash/3f1f3e38d1ce5653afb81505d3e26618-Abstract.html)
Supplement: Supplementary file 1 [file 3f1f3e38d1ce5653afb81505d3e26618-Supplemental-Conference.zip › Neurips_NNDM_Barrier/NeuralNetControlBarrier.jl/run.bash]

#!/bin/bash

set -e


case "$1" in

    pendulum) echo "Running $1"
            julia --project=/NeuralNetControlBarrier.jl Optimization/verification_pendulum.jl
            ;;

    cartpole) echo "Running $1"
            julia --project=/NeuralNetControlBarrier.jl Optimization/verification_cartpole.jl
            ;;

    husky4d) echo "Running $1"
            julia --project=/NeuralNetControlBarrier.jl Optimization/verification_husky4d.jl
            ;;

    husky5d) echo "Running $1"
        julia --project=/NeuralNetControlBarrier.jl Optimization/verification_husky5d.jl
        ;;

    acrobot) echo "Running $1"
        julia --project=/NeuralNetControlBarrier.jl Optimization/verification_acrobot.jl
        ;;
    *)     echo "Invalid flag"
           ;;
esac
