# Supplementary material
Source: ML conference proceedings conference paper supplement (https://proceedings.neurips.cc/paper_files/paper/2022/hash/3f1f3e38d1ce5653afb81505d3e26618-Abstract.html)
Supplement: Supplementary file 1 [file 3f1f3e38d1ce5653afb81505d3e26618-Supplemental-Conference.zip › Neurips_NNDM_Barrier/NeuralNetControlBarrier.jl/src/NeuralNetControlBarrier.jl]

# Module for Dynamical Neural Network Verification using Control Barrier Functions

module NeuralNetControlBarrier

# Import packages
using SumOfSquares
using MultivariatePolynomials, DynamicPolynomials
using MosekTools
using MAT 
using Polynomials
using StatsBase
using Combinatorics
using LinearAlgebra
using JuMP
using GLPK

# Call package and include functions
export 
    optimization, control_loop, inputs
    
    include("Functions.jl")
    include("Optimizer.jl")
    include("Controllers.jl")
    include("Systems.jl")
end # module
